# Supplementary material
Source: PubMed Central journal article supplement (PMC6434128)
Supplement: IAI.00823-18-s0001.pdf [file IAI.00823-18-s0001.pdf]

## **SUPPLEMENTAL MATERIAL**

### **Contributions of TolC orthologs to *Francisella tularensis* Schu S4 multidrug resistance, modulation of host cell responses, and virulence**

Erik J. Kopping, Christopher R. Doyle, Vinaya Sampath and David G. Thanassi

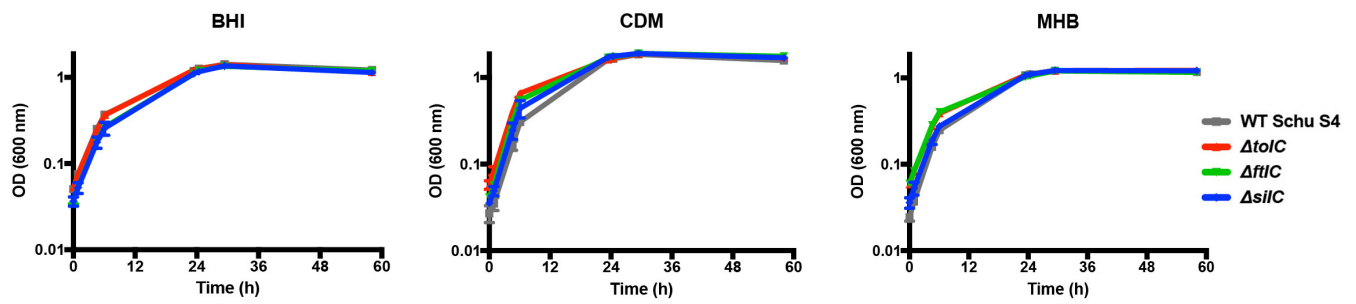

**Figure S1. Growth of Schu S4  $\Delta tolC$ ,  $\Delta ftlC$  and  $\Delta silC$ .** Bacteria were cultured in either BHI (A), CDM (B), or MHB (C) and analyzed for growth via OD<sub>600</sub>.

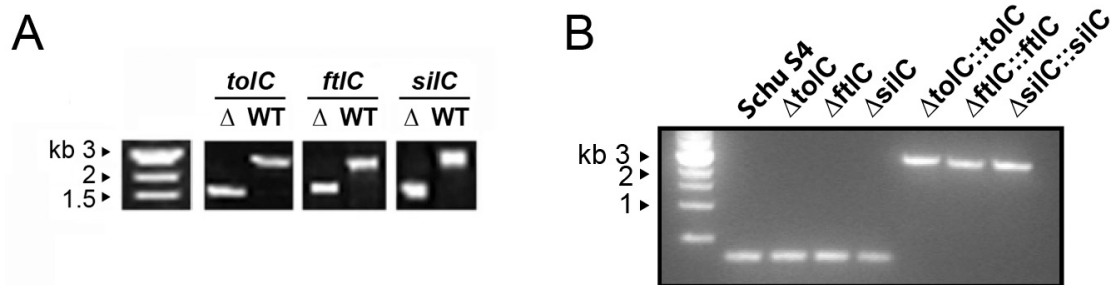

**Figure S2. Generation of Schu S4  $\Delta$ *tolC*,  $\Delta$ *ftlC* and  $\Delta$ *silC* mutants, and complemented strains.** (A) PCR confirming deletion of coding regions for *tolC*, *ftlC* and *silC*. (B) PCR confirming complementation of *tolC*, *ftlC* and *silC*.

**Table S1.** Primers used in this study

| Primer name   | Nucleotide sequence (5'-3')           | Description                                                                                         |
|---------------|---------------------------------------|-----------------------------------------------------------------------------------------------------|
| tolC_USR-F    | TTAGCCGTAGCAAGGCGTC                   | Forward primer for amplification of DNA upstream of tolC ORF for allelic exchange                   |
| tolC_USR-GC-R | GGGGGCCCCCGGGGGGCTAAAGCTAGACAAAACCC   | Reverse primer with GC overlap for amplification of DNA upstream of tolC ORF for allelic exchange   |
| tolC_DSR-GC-F | CCCCCGGGGGCCCCCGGAGTAATTAGTTTGATGCC   | Forward primer with GC overlap for amplification of DNA downstream of tolC ORF for allelic exchange |
| tolC_DSR-R    | GCACCACTCAAGCCTTTAGC                  | Reverse primer for amplification of DNA downstream of tolC ORF for allelic exchange                 |
| ftlC_USR-F    | TGTGGTGGTACTCATGTTGCCT                | Forward primer for amplification of DNA upstream of ftlC ORF for allelic exchange                   |
| ftlC_USR-GC-R | GGGGGCCCCCGGGGGCGCACTACTTTCAAGCCACC   | Reverse primer with GC overlap for amplification of DNA upstream of ftlC ORF for allelic exchange   |
| ftlC_DSR-GC-F | CCCCCGGGGGCCCCCGACGTGGAGCTATAAAGATG   | Forward primer with GC overlap for amplification of DNA downstream of ftlC ORF for allelic exchange |
| ftlC_DSR-R    | TAGCAATATCAGCTGGCCCC                  | Reverse primer for amplification of DNA downstream of ftlC ORF for allelic exchange                 |
| silC_USR-F    | GGTGCAGCCAACTAAGCTA                   | Forward primer for amplification of DNA upstream of silC ORF for allelic exchange                   |
| silC_USR-GC-R | GGGGGCCCCCGGGGGCGTATCATTGTTGTGACCTA   | Reverse primer with GC overlap for amplification of DNA upstream of silC ORF for allelic exchange   |
| silC_DSR-GC-F | CCCCCGGGGGCCCCCTCCTCATTATGATAACCCAGCT | Forward primer with GC overlap for amplification of DNA downstream of silC ORF for allelic exchange |
| silC_DSR-R    | GCAGCCCCATCACCGAATTT                  | Reverse primer for amplification of DNA downstream of silC ORF for allelic exchange                 |
| SchuGroF      | TTGTATGGATTAGTCGAGCT                  | Forward primer for amplification of DNA upstream of <i>GroESL</i> operon                            |
| SchuGro_kpnl  | GCGCGGACGTCTTGATGGATTAGTCGAGC         | Forward primer for amplification of DNA upstream of <i>GroESL</i> operon                            |
| SchuGroR      | TGCACGACGAACTAATACTC                  | Reverse primer for amplification of DNA upstream of <i>GroESL</i> operon                            |
| TolC_NotI     | CCCGCGGCCGCATGAAGAAGTTAACATTATATC     | Forward primer for amplification of open reading frame of <i>tolC</i> gene                          |
| TolC_BamHI    | CCCGGATCCTTACTCCGTTGCAATCTGCG         | Reverse primer for amplification of open reading frame of <i>tolC</i> gene                          |
| FtlC_NotI     | CCCGCGGCCGCTTGAAAGTAGTGCGTAGAT        | Forward primer for amplification of open reading frame of <i>ftlC</i> gene                          |
| FtlC_BamHI    | CCCGGATCCTTATAGCTCCACGTCTTGACC        | Reverse primer for amplification of open reading frame of <i>ftlC</i> gene                          |
| SilC_NotI     | CCCGCGGCCGCATGATACGAAATAAAATAC        | Forward primer for amplification of open reading frame of <i>silC</i> gene                          |
| SilC_BamHI    | CCCGGATCCCTATTTATCAAAGCTGGGTT         | Reverse primer for amplification of open reading frame of <i>silC</i> gene                          |
